# Supplementary material
Source: PubMed Central journal article supplement (PMC10397370)
Supplement: NIHMS1825248-supplement-1.pdf [file NIHMS1825248-supplement-1.pdf]

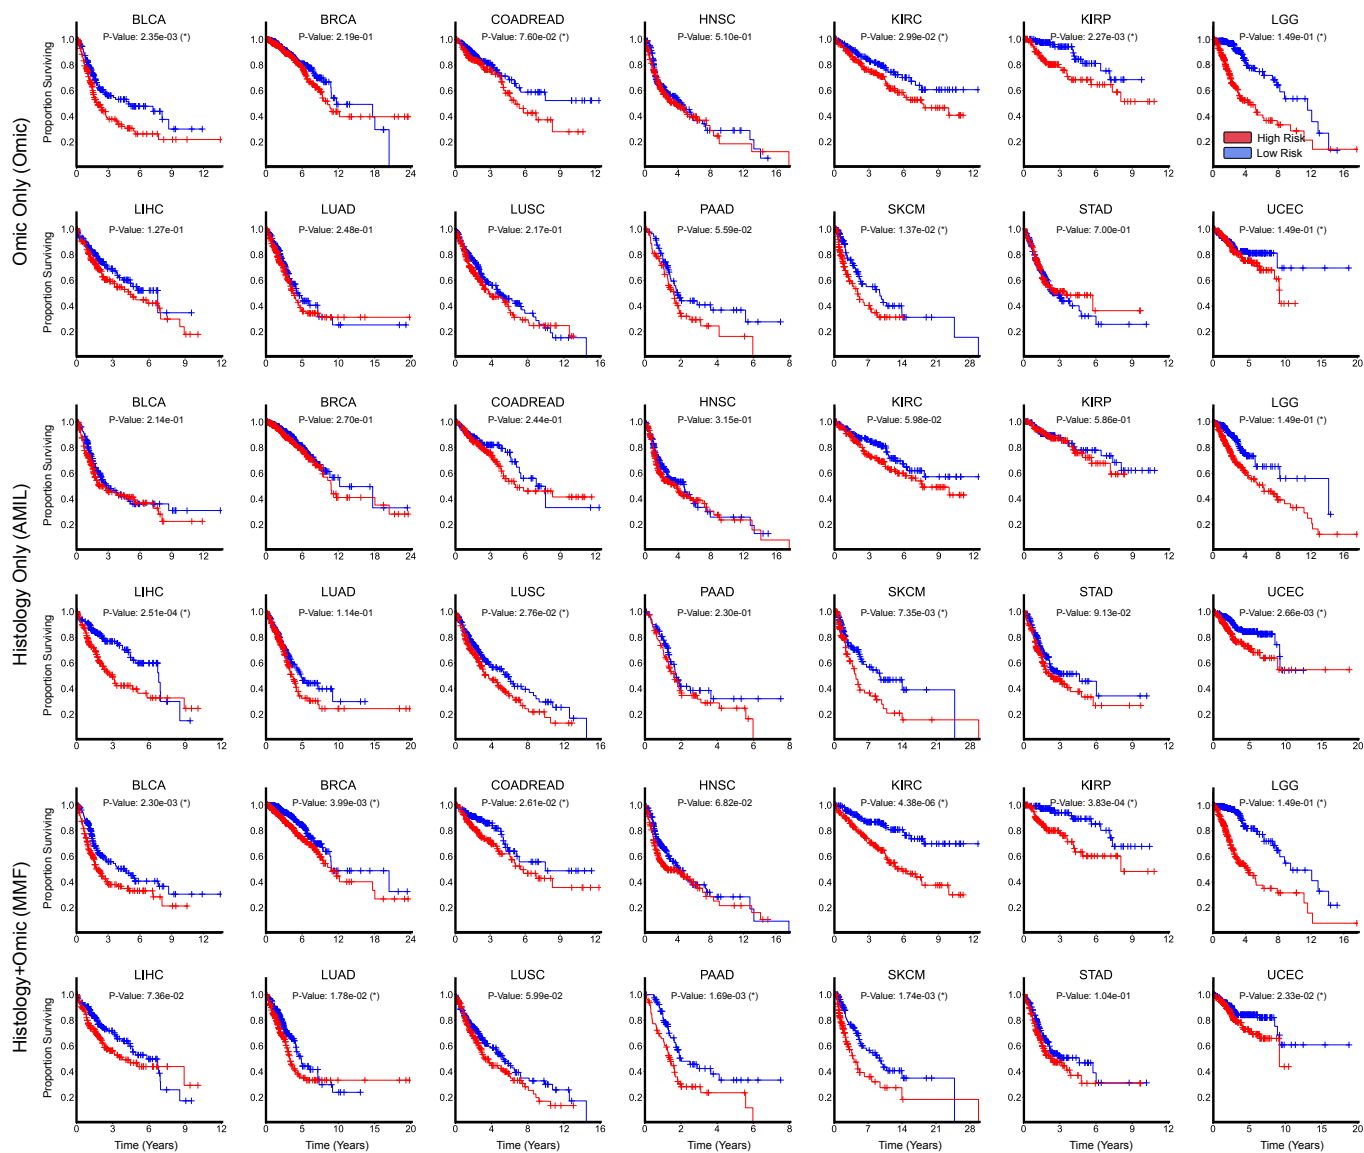

**Figure S1: Kaplan-Meier comparative analysis of SNN, AMIL, and MMF. Related to Figure 2.** Kaplan-Meier comparative analysis of SNN, AMIL, and MMF of patient stratification of low- and high-risk patients across all 14 cancer types. low- and high-risks are defined by the median 50% percentile of risk predictions. Logrank test was used to test for statistical significance in survival distributions between low- and high-risk patients (with \* marked if P-Value < 0.05). For all model types and cancer types, out-of-sample risk predictions in the validation folds were pooled to show overall survival distribution on the entire cohort.

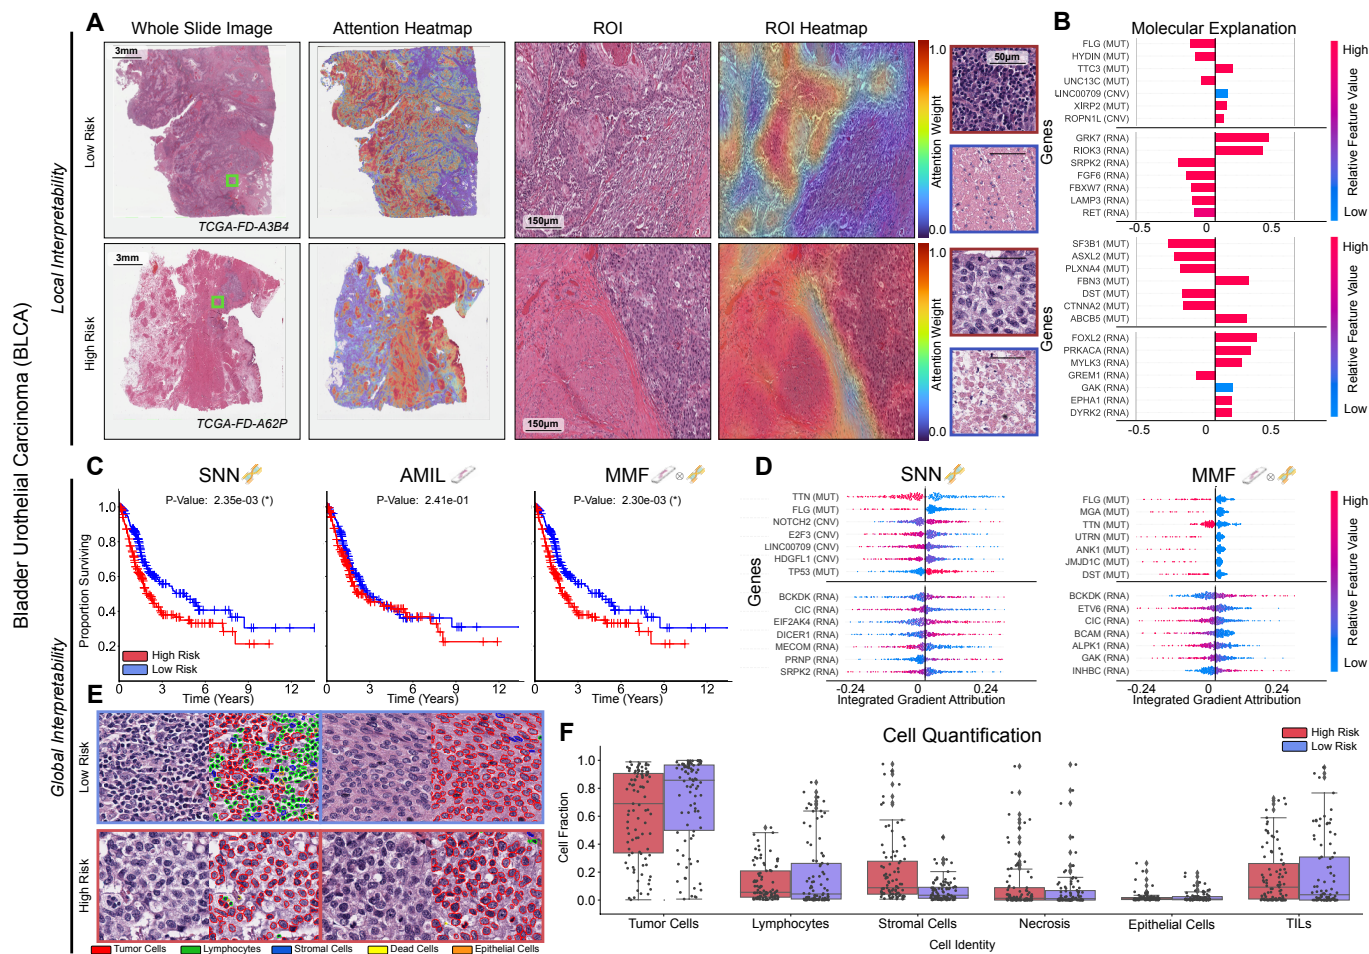

**Figure S2: Quantitative performance, local model explanation, and global interpretability pooled analyses of PORPOISE on BLCA. Related to Figure 3, 4, 5, and 6.** **A.** WSIs, associated attention heatmaps, ROIs, ROI heatmaps, and selected high attention patches from example low-risk (top) and high-risk (bottom) cases. In BLCA ( $n=358$ ), high attention for low-risk cases ( $n=90$ ) tends to focus on aggregates of lymphocytes, thick tumor papillae, and muscularis, while in high-risk cases ( $n=93$ ), high attention focuses on sheet-like and solid tumor growth, muscularis, and areas of necrosis. **B.** Local gene attributions for the corresponding low-risk (top) and high-risk (bottom) cases. **C.** Kaplan–Meier curves for omics-only (left, “SNN”), histology-only (center, “AMIL”) and multimodal fusion (right, “MMF”), showing improved patient stratification over AMIL and long-surviving patients in SNN. **D.** Global gene attributions across patient cohorts according to unimodal interpretability (left, “SNN”), and multimodal interpretability (right, “MMF”). **E.** High attention patches from low-risk (top) and high-risk (bottom) cases with corresponding cell labels. **F.** Quantification of cell types in high attention patches for all cases of BLCA with high-risk in red and low-risk in blue, showing high tumor cell abundance in both risk groups, with increased stromal cell presence in high-risk groups.

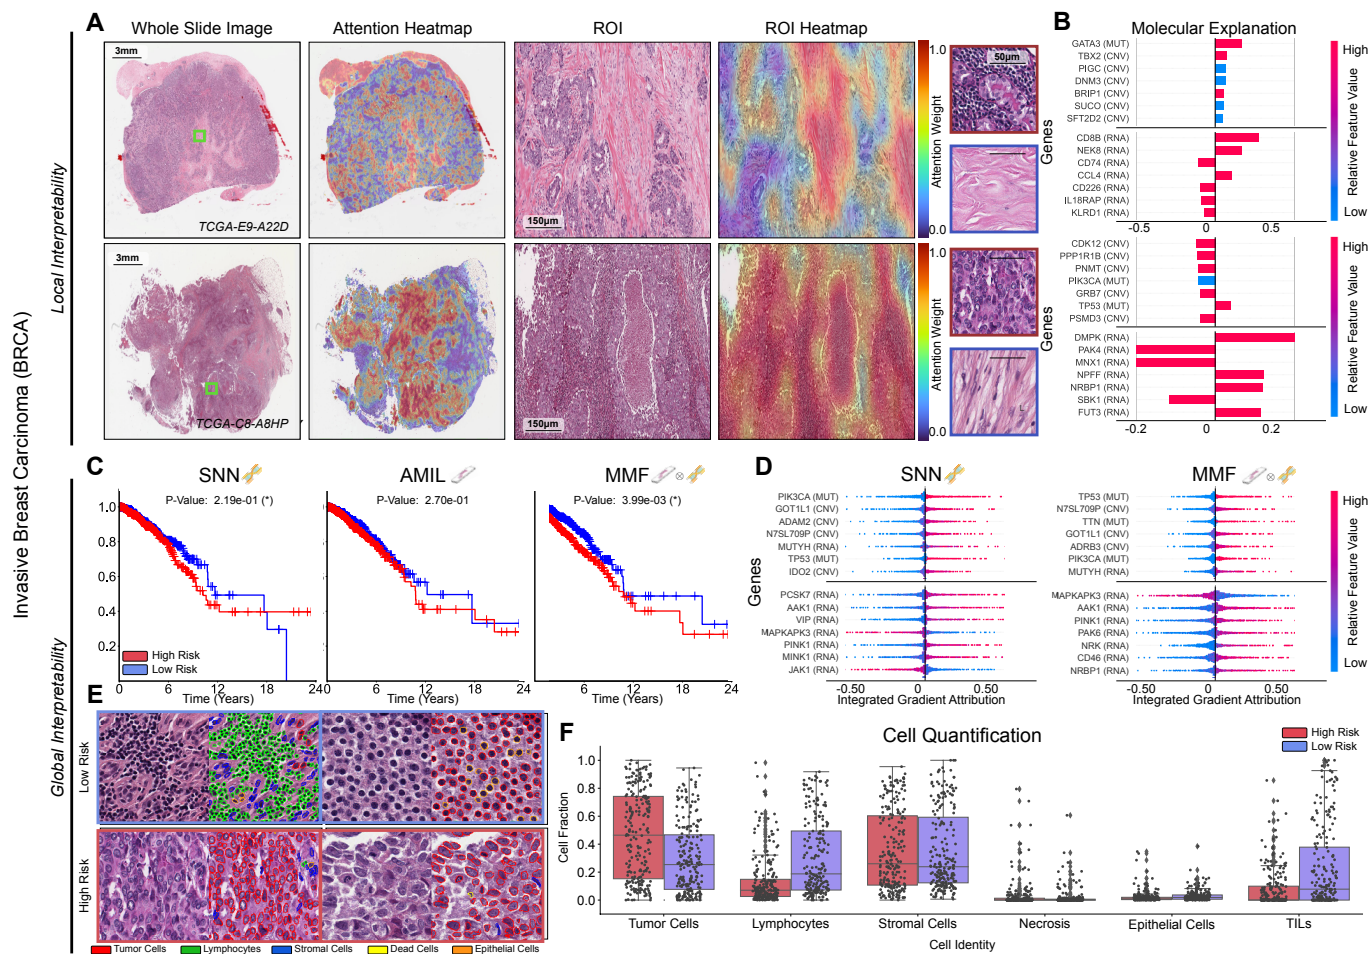

**Figure S3: Quantitative performance, local model explanation, and global interpretability analyses of PORPOISE on BRCA. Related to Figure 3, 4, 5, and 6.** **A.** WSIs, associated attention heatmaps, ROIs, ROI heatmaps, and selected high attention patches from example low-risk (top) and high-risk (bottom) cases. In BRCA ( $n=730$ ), high attention for low-risk cases ( $n=22$ ) tends to focus on collagenous stroma and aggregates of lymphocytes, while in high-risk cases ( $n=223$ ), high attention focuses on areas of tumor cells with increased mitotic activity, nuclear pleomorphism, and necrosis. **B.** Local gene attributions for the corresponding low-risk (top) and high-risk (bottom) cases. **C.** Kaplan–Meier curves for omics-only (left, “SNN”), histology-only (center, “AMIL”) and multimodal fusion (right, “MMF”), showing improved patient stratification over AMIL and long-surviving patients in SNN. **D.** Global gene attributions across patient cohorts according to unimodal interpretability (left, “SNN”), and multimodal interpretability (right, “MMF”). **E.** High attention patches from low-risk (top) and high-risk (bottom) cases with corresponding cell labels. **F.** Quantification of cell types in high attention patches for each disease overall, showing decreased tumor cell abundance and increased lymphocyte and TIL presence in low-risk groups.

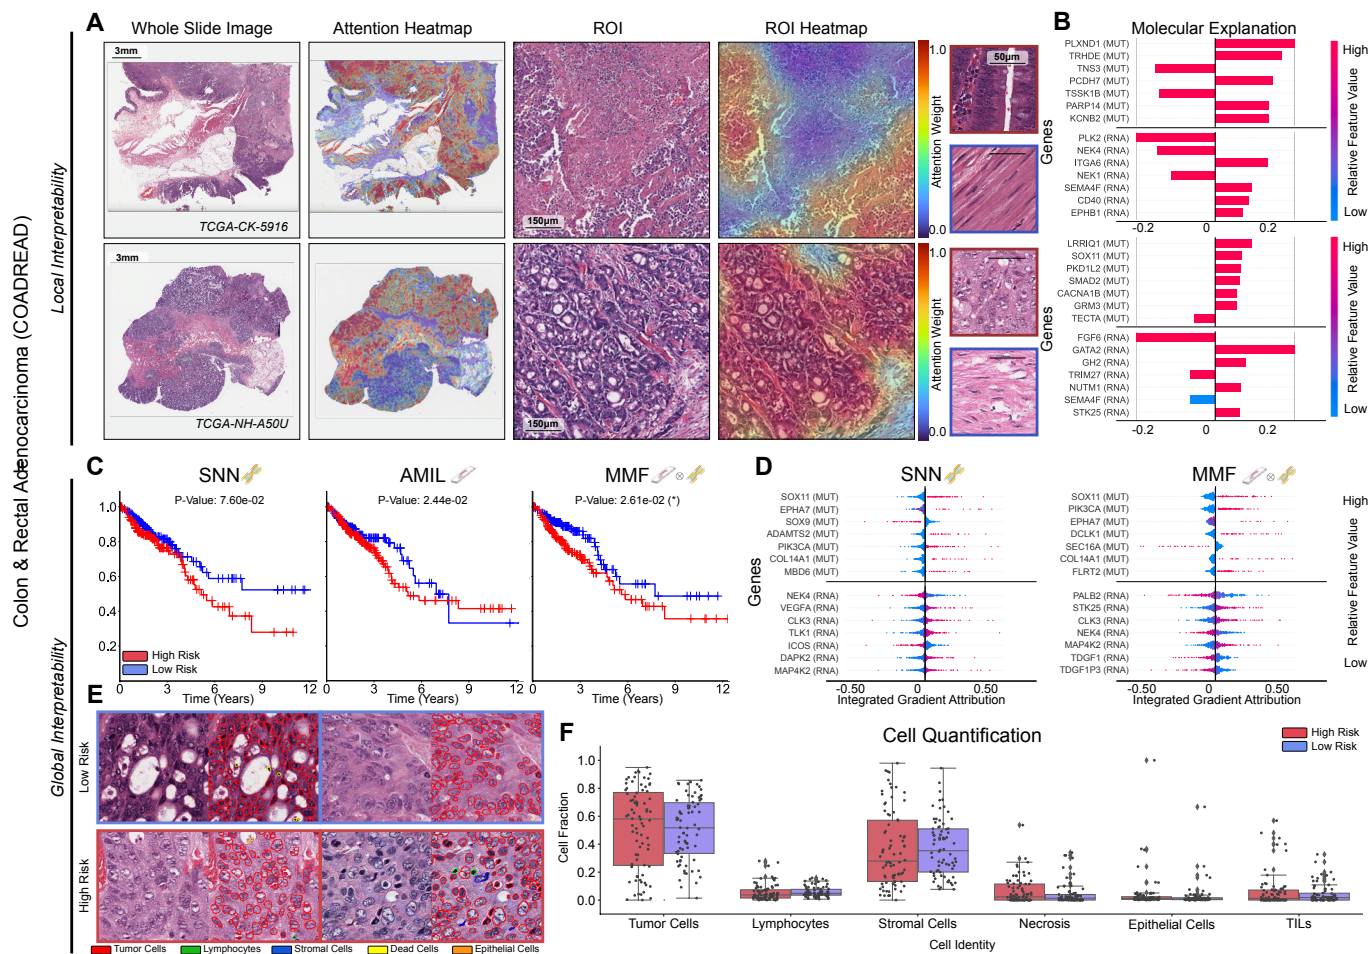

**Figure S4: Quantitative performance, local model explanation, and global interpretability analyses of PORPOISE on COADREAD. Related to Figure 3, 4, 5, and 6.** **A.** WSIs, associated attention heatmaps, ROIs, ROI heatmaps, and selected high attention patches from example low-risk (top) and high-risk (bottom) cases. In COADREAD ( $n=338$ ), high attention for low-risk cases ( $n=74$ ) tends to focus on muscularis, solid tumor growth and small nests of tumor cells, while in high-risk cases ( $n=80$ ), high attention focuses on tumor cells invading the submucosa into the muscularis. **B.** Local gene attributions for the corresponding low-risk (top) and high-risk (bottom) cases. **C.** Kaplan–Meier curves for omics-only (left, “SNN”), histology-only (center, “AMIL”) and multimodal fusion (right, “MMF”), showing improved patient stratification over AMIL and long-surviving patients in SNN. **D.** Global gene attributions across patient cohorts according to unimodal interpretability (left, “SNN”), and multimodal interpretability (right, “MMF”). **E.** High attention patches from low-risk (top) and high-risk (bottom) cases with corresponding cell labels. **F.** Quantification of cell types in high attention patches for each disease overall, showing similar admixtures of tumor cells, lymphocytes, and stromal cells across both risk groups.

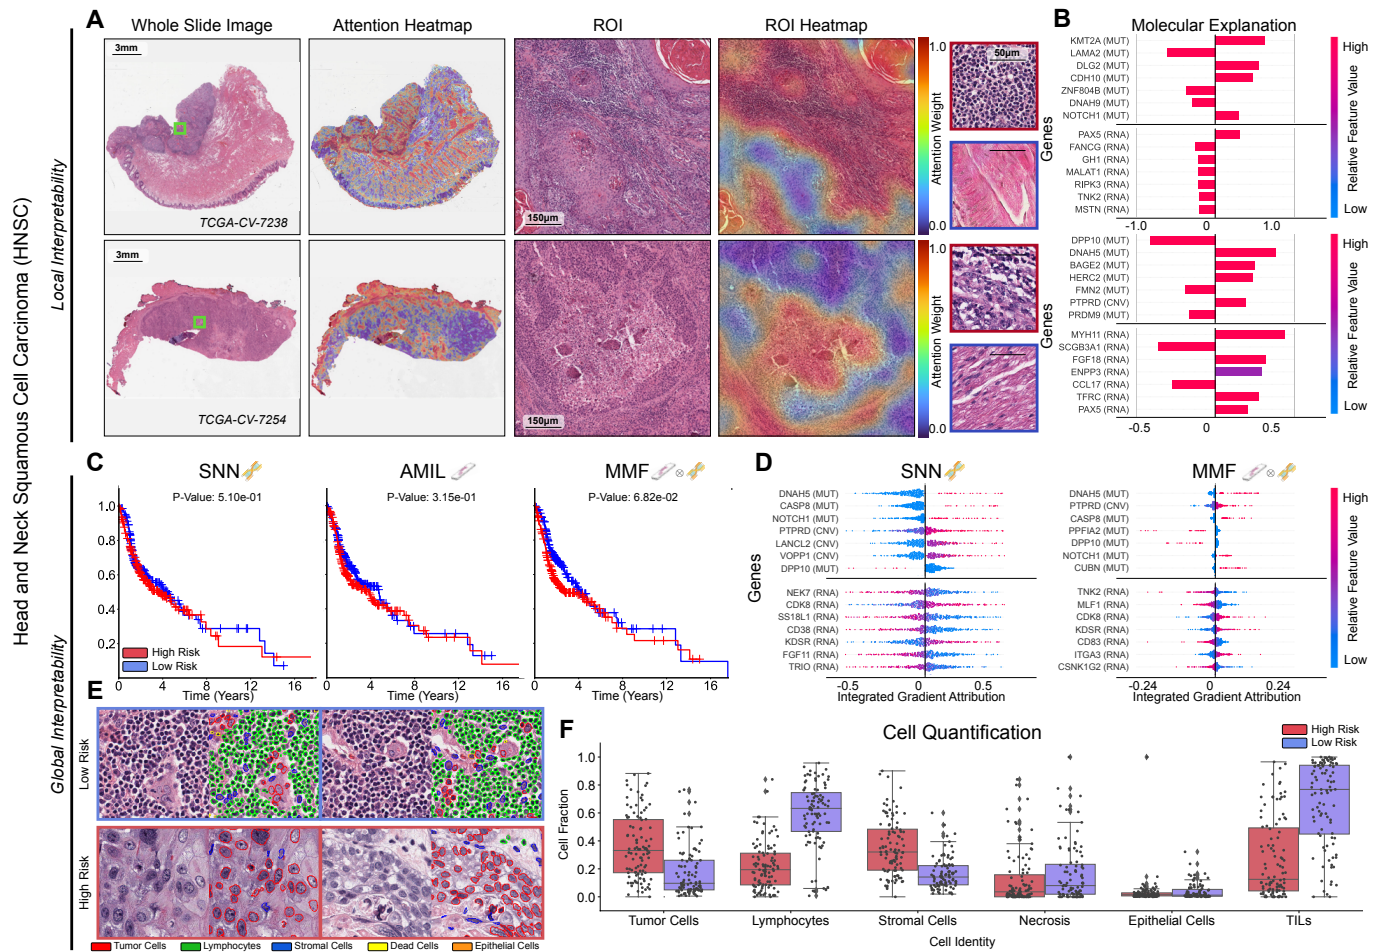

**Figure S5: Quantitative performance, local model explanation, and global interpretability pooled analyses of PORPOISE on HNSC. Related to Figure 3, 4, 5, and 6. A.** WSIs, associated attention heatmaps, ROIs, ROI heatmaps, and selected high attention patches from example low-risk (top) and high-risk (bottom) cases. In HNSC ( $n=413$ ), high attention for low-risk cases ( $n=96$ ) tends to focus on regions with increased tumor infiltrating lymphocytes, while in high-risk cases ( $n=103$ ), high attention areas corresponded with regions with central necrosis. For both high and low-risk cases, the low attention regions focused on mainly background stroma. **B.** Local gene attributions for the corresponding low-risk (top) and high-risk (bottom) cases. **C.** Kaplan–Meier curves for omics-only (left, "SNN"), histology-only (center, "AMIL") and multimodal fusion (right, "MMF"), with statistically significant patient stratification between low- and high-risk groups across all models. **D.** Global gene attributions across patient cohorts according to unimodal interpretability (left, "SNN"), and multimodal interpretability (right, "MMF"). **E.** High attention patches from low-risk (top) and high-risk (bottom) cases with corresponding cell labels. **F.** Quantification of cell types in high attention patches for each disease overall, showing increased tumor cell presence in the high-risk group, with increased lymphocyte and TIL presence in the low-risk group.

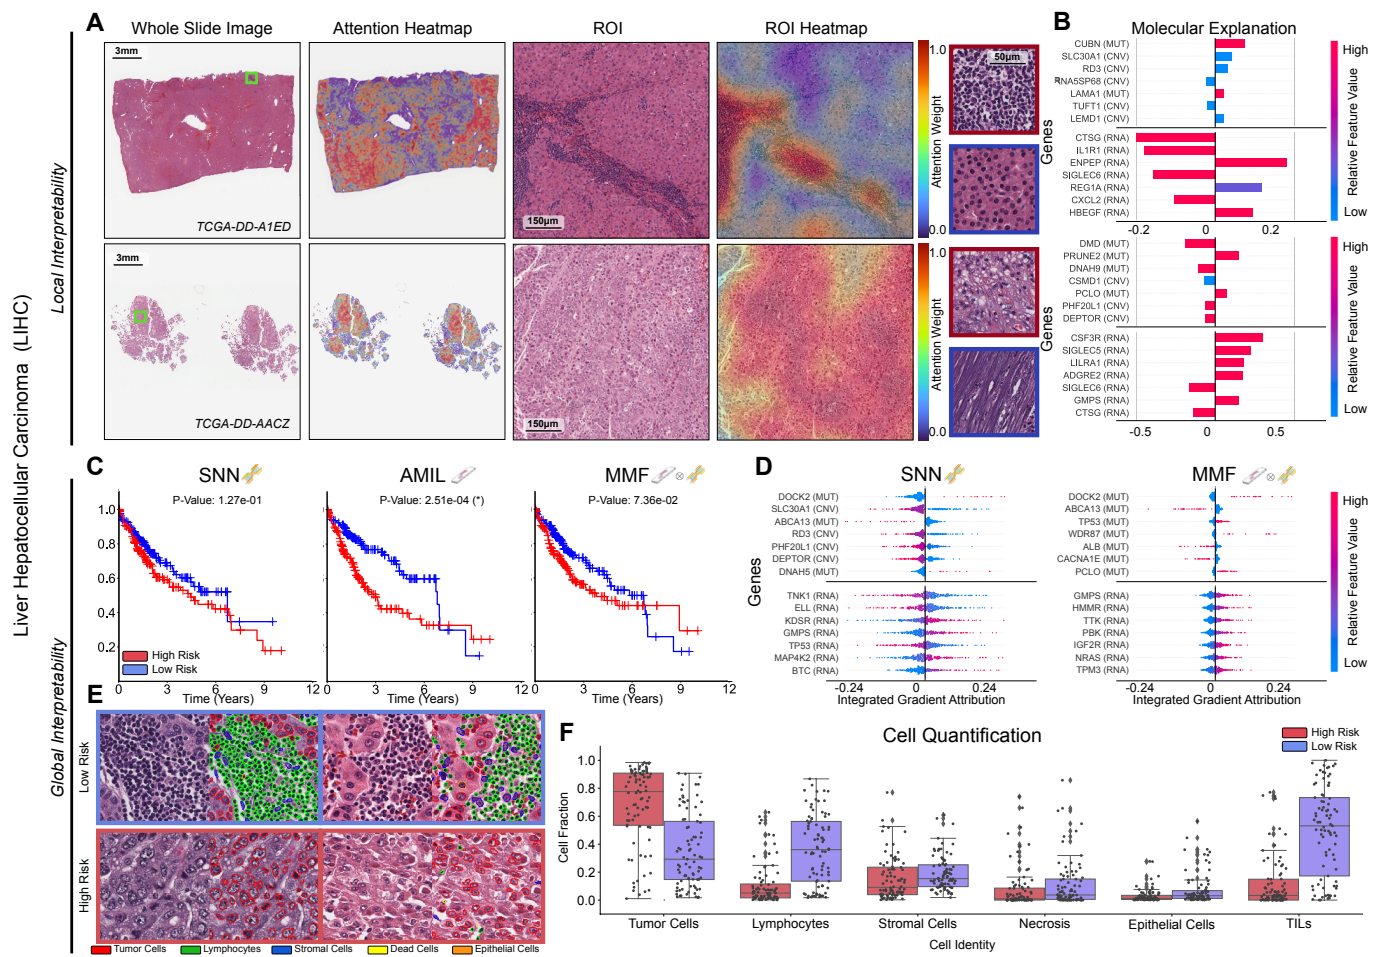

**Figure S6: Quantitative performance, local model explanation, and global interpretability pooled analyses of PORPOISE on LIHC. Related to Figure 3, 4, 5, and 6. A.** WSIs, associated attention heatmaps, ROIs, ROI heatmaps, and selected high attention patches from example low-risk (top) and high-risk (bottom) cases. In LIHC ( $n=332$ ), high attention for low-risk cases ( $n=85$ ) tends to focus on dense regions of lymphocytes, while in high-risk cases ( $n=84$ ), high attention focuses on areas with high tumor-grade morphology, such as increased nuclear pleomorphism. **B.** Local gene attributions for the corresponding low-risk (top) and high-risk (bottom) cases. **C.** Kaplan–Meier curves for omics-only (left, “SNN”), histology-only (center, “AMIL”) and multimodal fusion (right, “MMF”), showing poor stratification with SNN and better stratification in AMIL and MMF. **D.** Global gene attributions across patient cohorts according to unimodal interpretability (left, “SNN”), and multimodal interpretability (right, “MMF”). **E.** High attention patches from low-risk (top) and high-risk (bottom) cases with corresponding cell labels. **F.** Quantification of cell types in high attention patches for each disease overall, showing increased tumor cell presence in high-risk patients and increased lymphocyte and TIL presence in low-risk patients.

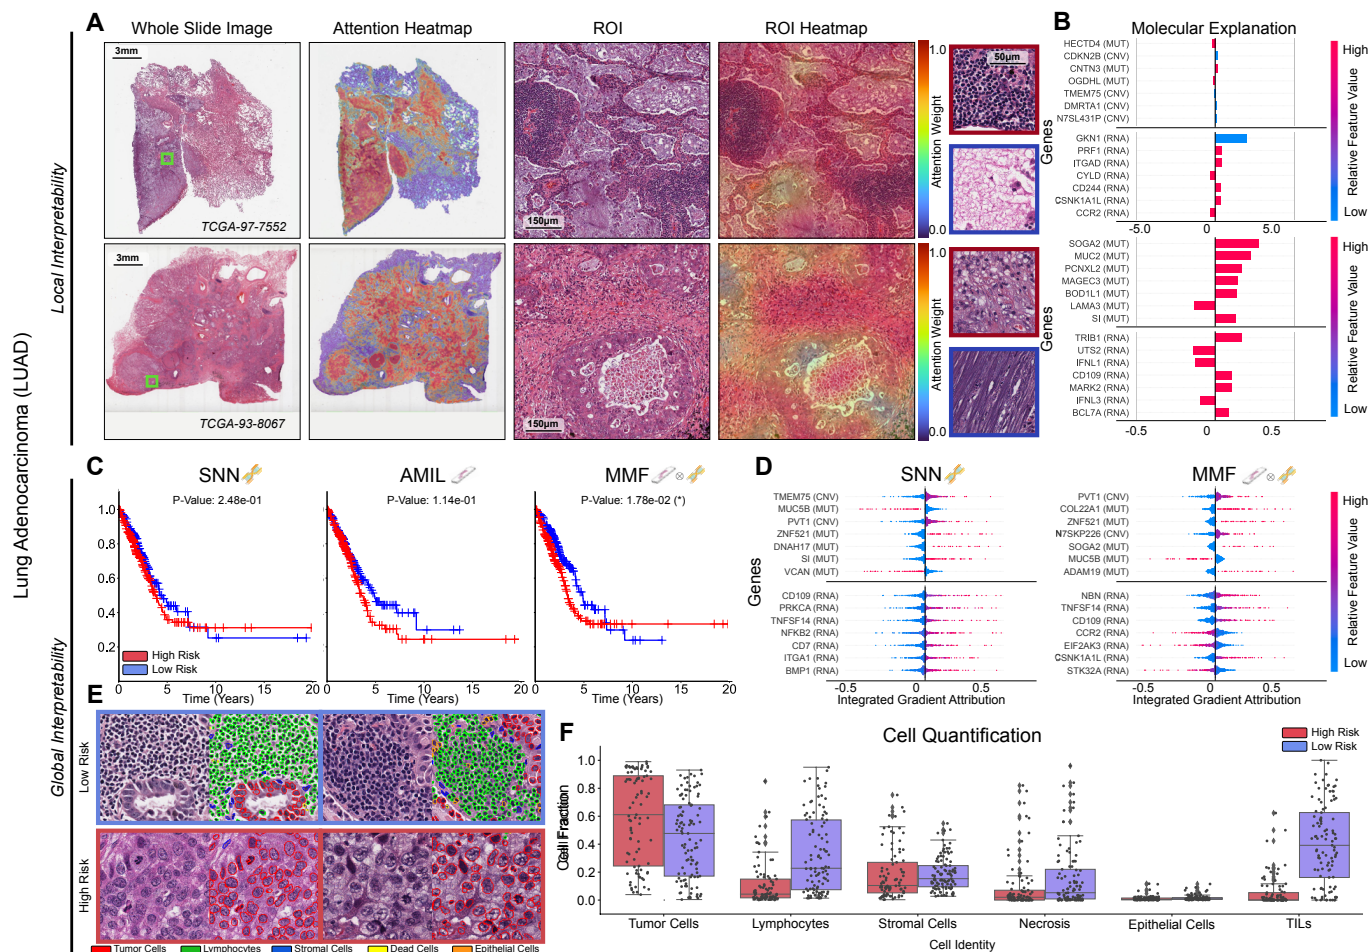

**Fig. S7: Quantitative performance, local model explanation, and global interpretability analyses of PORPOISE on LUAD. Related to Figure 3, 4, 5, and 6.** **A.** WSIs, associated attention heatmaps, ROIs, ROI heatmaps, and selected high attention patches from example low-risk (top) and high-risk (bottom) cases. In LUAD ( $n=431$ ), high attention for low-risk cases ( $n=105$ ) tends to focus on regions with dense inflammatory infiltrate, predominantly comprised of lymphocytes, and regions of mucin deposition, while in high-risk cases ( $n=89$ ), high attention focuses on tumor cells with increased nuclear pleomorphism, areas of necrosis, and tumor-associated dense fibrous stroma. **B.** Local gene attributions for the corresponding low-risk (top) and high-risk (bottom) cases. **C.** Kaplan–Meier curves for omics-only (left, "SNN"), histology-only (center, "AMIL") and multimodal fusion (right, "MMF"), showing poor stratification with SNN and better stratification in AMIL and MMF. **D.** Global gene attributions across patient cohorts according to unimodal interpretability (left, "SNN"), and multimodal interpretability (right, "MMF"). **E.** High attention patches from low-risk (top) and high-risk (bottom) cases with corresponding cell labels. **F.** Quantification of cell types in high attention patches for each disease overall, showing increased lymphocyte and TIL presence in low-risk patients.

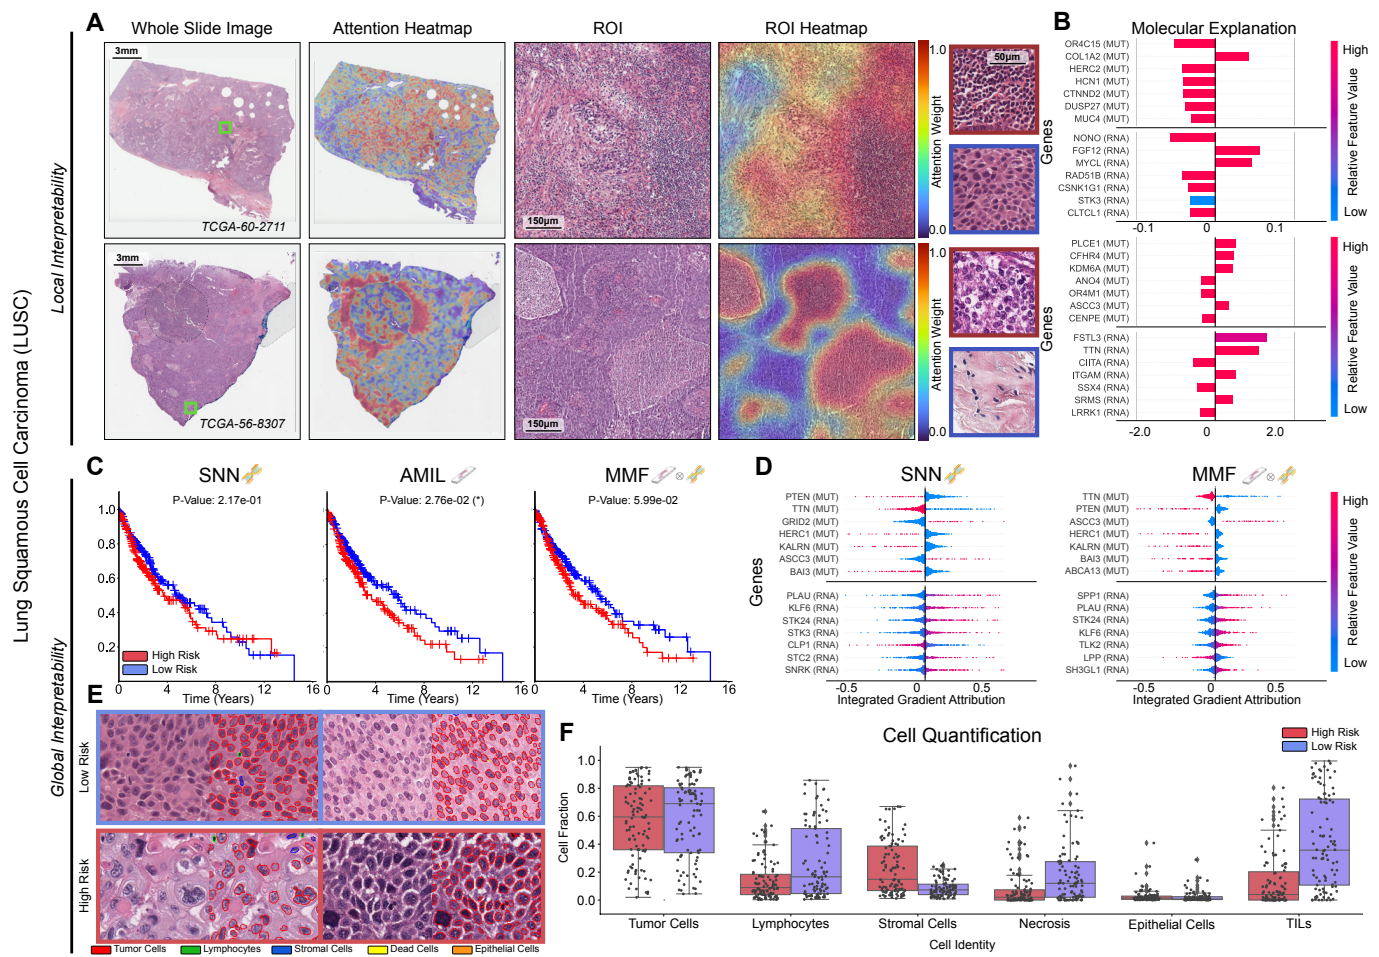

**Figure S8: Quantitative performance, local model explanation, and global interpretability pooled analyses of PORPOISE on LUSC. Related to Figure 3, 4, 5, and 6. A.** WSIs, associated attention heatmaps, ROIs, ROI heatmaps, and selected high attention patches from example low-risk (top) and high-risk (bottom) cases. In LUSC (n=441), high attention for low-risk cases (n=97) tends to focus on regions with dense inflammatory infiltrate, predominantly comprised of lymphocytes (presumed TILs), while in high-risk cases (n=103), high attention focuses on regions of central necrosis within tumor nests. **B.** Local gene attributions for the corresponding low-risk (top) and high-risk (bottom) cases. **C.** Kaplan–Meier curves for omics-only (left, "SNN"), histology-only (center, "AMIL") and multimodal fusion (right, "MMF"), showing improved patient stratification over AMIL and late-stage patients in SNN. **D.** Global gene attributions across patient cohorts according to unimodal interpretability (left, "SNN"), and multimodal interpretability (right, "MMF"). **E.** High attention patches from low-risk (top) and high-risk (bottom) cases with corresponding cell labels. **F.** Quantification of cell types in high attention patches for each disease overall, showing increased lymphocyte and TIL presence in low-risk patients.



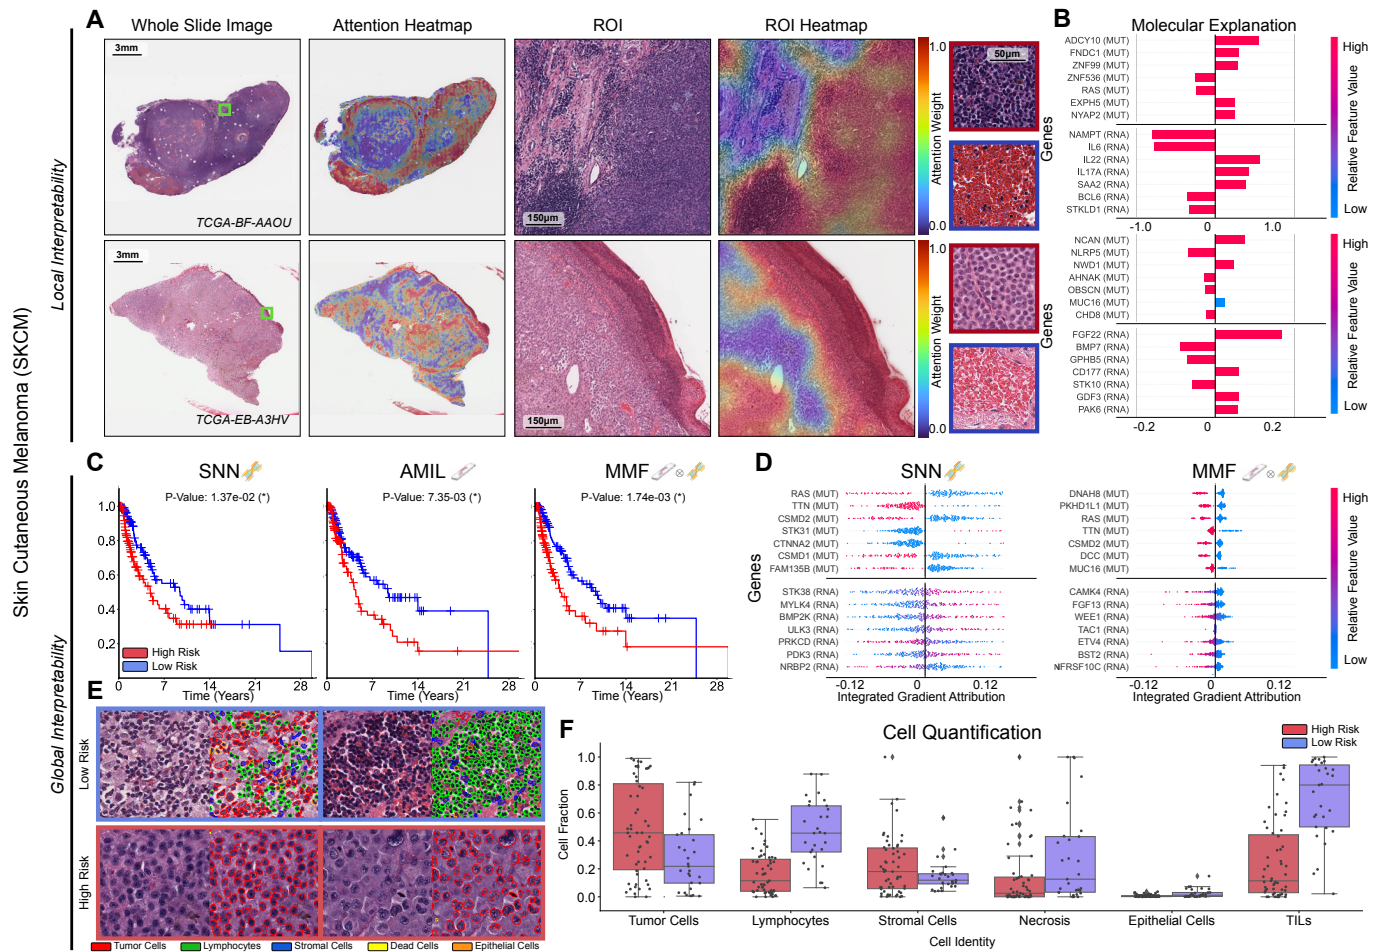

**Figure S9: Quantitative performance, local model explanation, and global interpretability pooled analyses of PORPOISE on SKCM. Related to Figure 3, 4, 5, and 6.** **A.** WSIs, associated attention heatmaps, ROIs, ROI heatmaps, and selected high attention patches from example low-risk (top) and high-risk (bottom) cases. In SKCM ( $n=222$ ), high attention regions for low-risk cases ( $n=29$ ) focused on tumor-infiltrating lymphocytes, while the high attention regions for high-risk cases ( $n=55$ ) paid more attention to ulcerated regions and regions of densely packed tumor cells. For both high and low-risk cases, the low attention regions focused mainly on background blood. **B.** Local gene attributions for the corresponding low-risk (top) and high-risk (bottom) cases. **C.** Kaplan–Meier curves for omics-only (left, "SNN"), histology-only (center, "AMIL") and multimodal fusion (right, "MMF"), showing better patient stratification in AMIL and SNN. **D.** Global gene attributions across patient cohorts according to unimodal interpretability (left, "SNN"), and multimodal interpretability (right, "MMF"). **E.** High attention patches from low-risk (top) and high-risk (bottom) cases with corresponding cell labels. **F.** Quantification of cell types in high attention patches for each disease overall, showing increased tumor cell and necrosis presence in the high-risk group, with increased lymphocyte and TIL presence in the low-risk group.

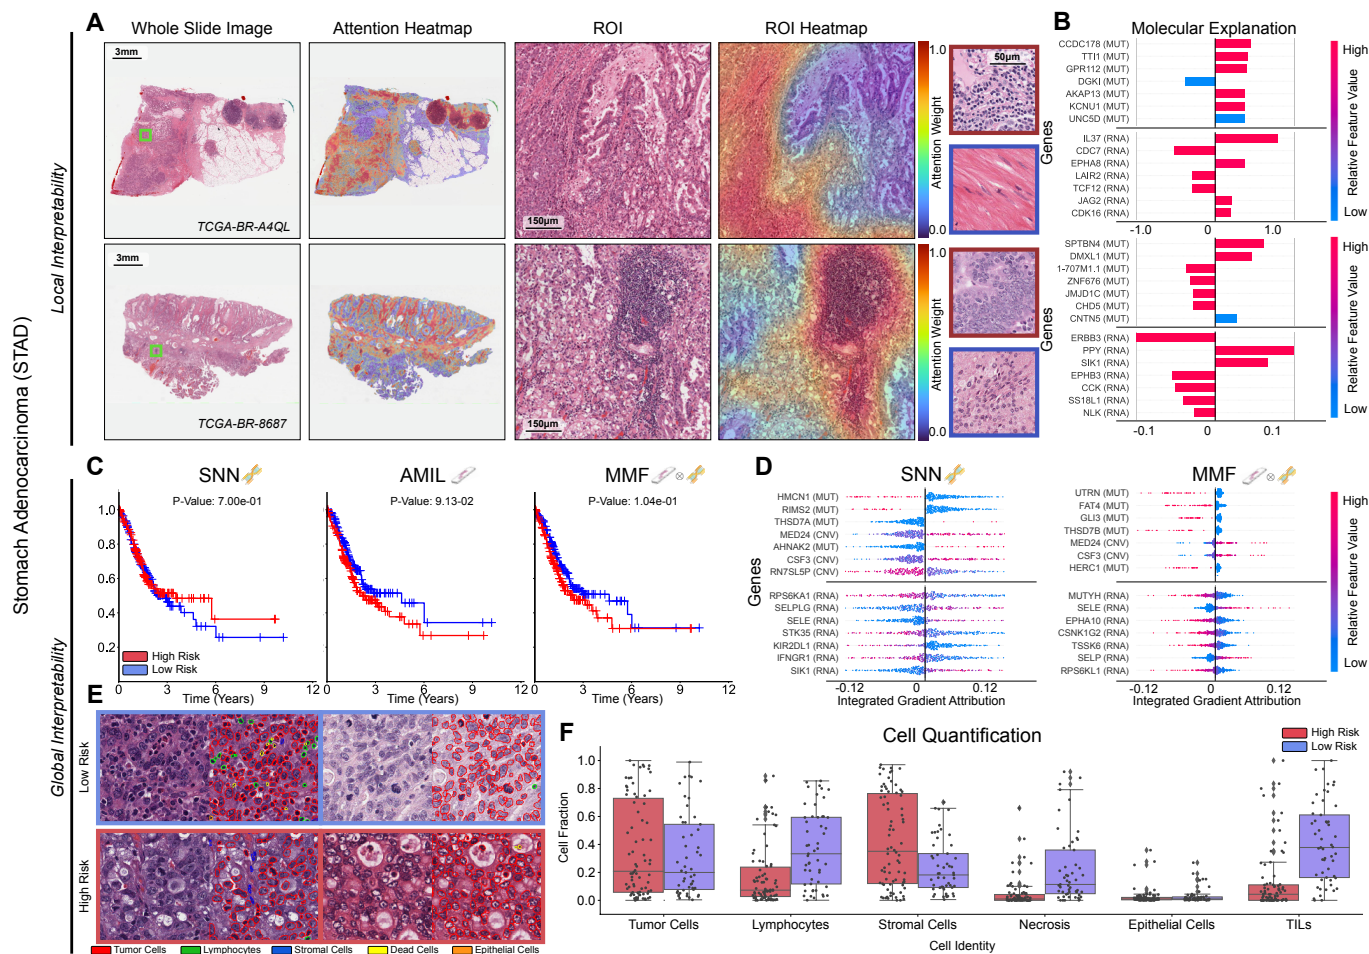

**Figure S10: Quantitative performance, local model explanation, and global interpretability pooled analyses of PORPOISE on STAD. Related to Figure 3, 4, 5, and 6.** **A.** WSIs, associated attention heatmaps, ROIs, ROI heatmaps, and selected high attention patches from example low-risk (top) and high-risk (bottom) cases. In STAD ( $n=347$ ), high attention for low-risk cases ( $n=53$ ) tends to focus on dense regions of tumor, lymphocytes, and muscularis, while in high-risk cases ( $n=78$ ), high attention focuses on dense regions of tumor and lymphocytes. **B.** Local gene attributions for the corresponding low-risk (top) and high-risk (bottom) cases. **C.** Kaplan–Meier curves for omics-only (left, "SNN"), histology-only (center, "AMIL") and multimodal fusion (right, "MMF"), showing better patient stratification in AMIL and SNN. **D.** Global gene attributions across patient cohorts according to unimodal interpretability (left, "SNN"), and multimodal interpretability (right, "MMF"). **E.** High attention patches from low-risk (top) and high-risk (bottom) cases with corresponding cell labels. **F.** Quantification of cell types in high attention patches for each disease overall, showing increased lymphocyte and TIL presence in the low-risk group.

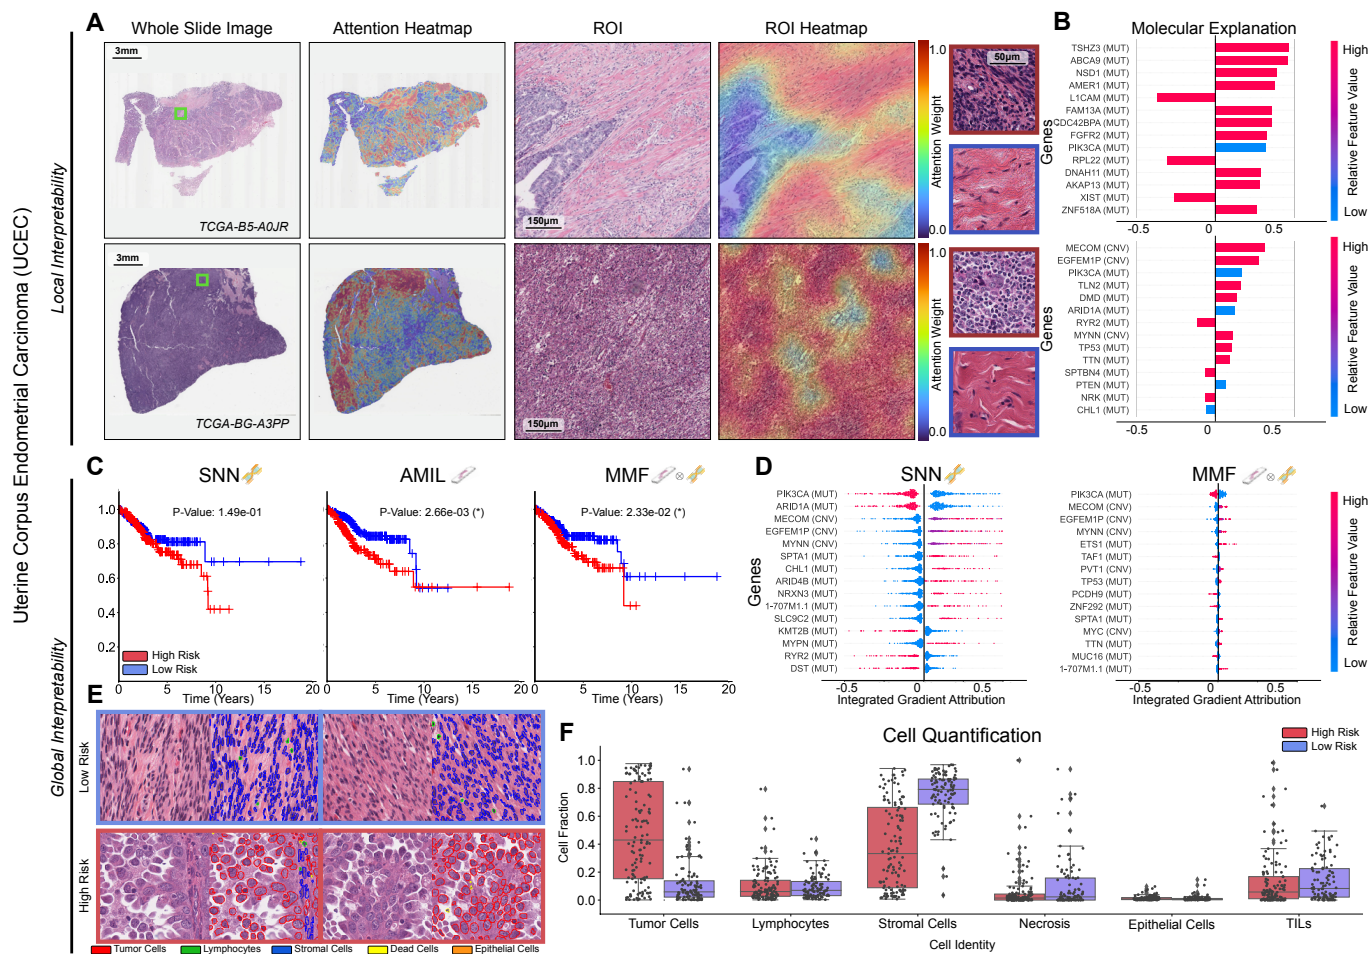

**Figure S11: Quantitative performance, local model explanation, and global interpretability pooled analyses of PORPOISE on UCEC. Related to Figure 3, 4, 5, and 6. A.** WSIs, associated attention heatmaps, ROIs, ROI heatmaps, and selected high attention patches from example low-risk (top) and high-risk (bottom) cases. In UCEC (n=460), high attention for low-risk cases (n=104) tends to focus on background myometrium, while in high-risk cases (n=125), high attention focuses on tumor regions, especially those with increased nuclear pleomorphism and atypia. **B.** Local gene attributions for the corresponding low-risk (top) and high-risk (bottom) cases. **C.** Kaplan–Meier curves for omics-only (left, “SNN”), histology-only (center, “AMIL”) and multimodal fusion (right, “MMF”), showing improved patient stratification over AMIL and late-stage patients in SNN. **D.** Global gene attributions across patient cohorts according to unimodal interpretability (left, “SNN”), and multimodal interpretability (right, “MMF”). **E.** High attention patches from low-risk (top) and high-risk (bottom) cases with corresponding cell labels. **F.** Quantification of cell types in high attention patches for each disease overall, showing increased tumor cell presence in high-risk patients and increased stromal cell presence in low-risk patients.

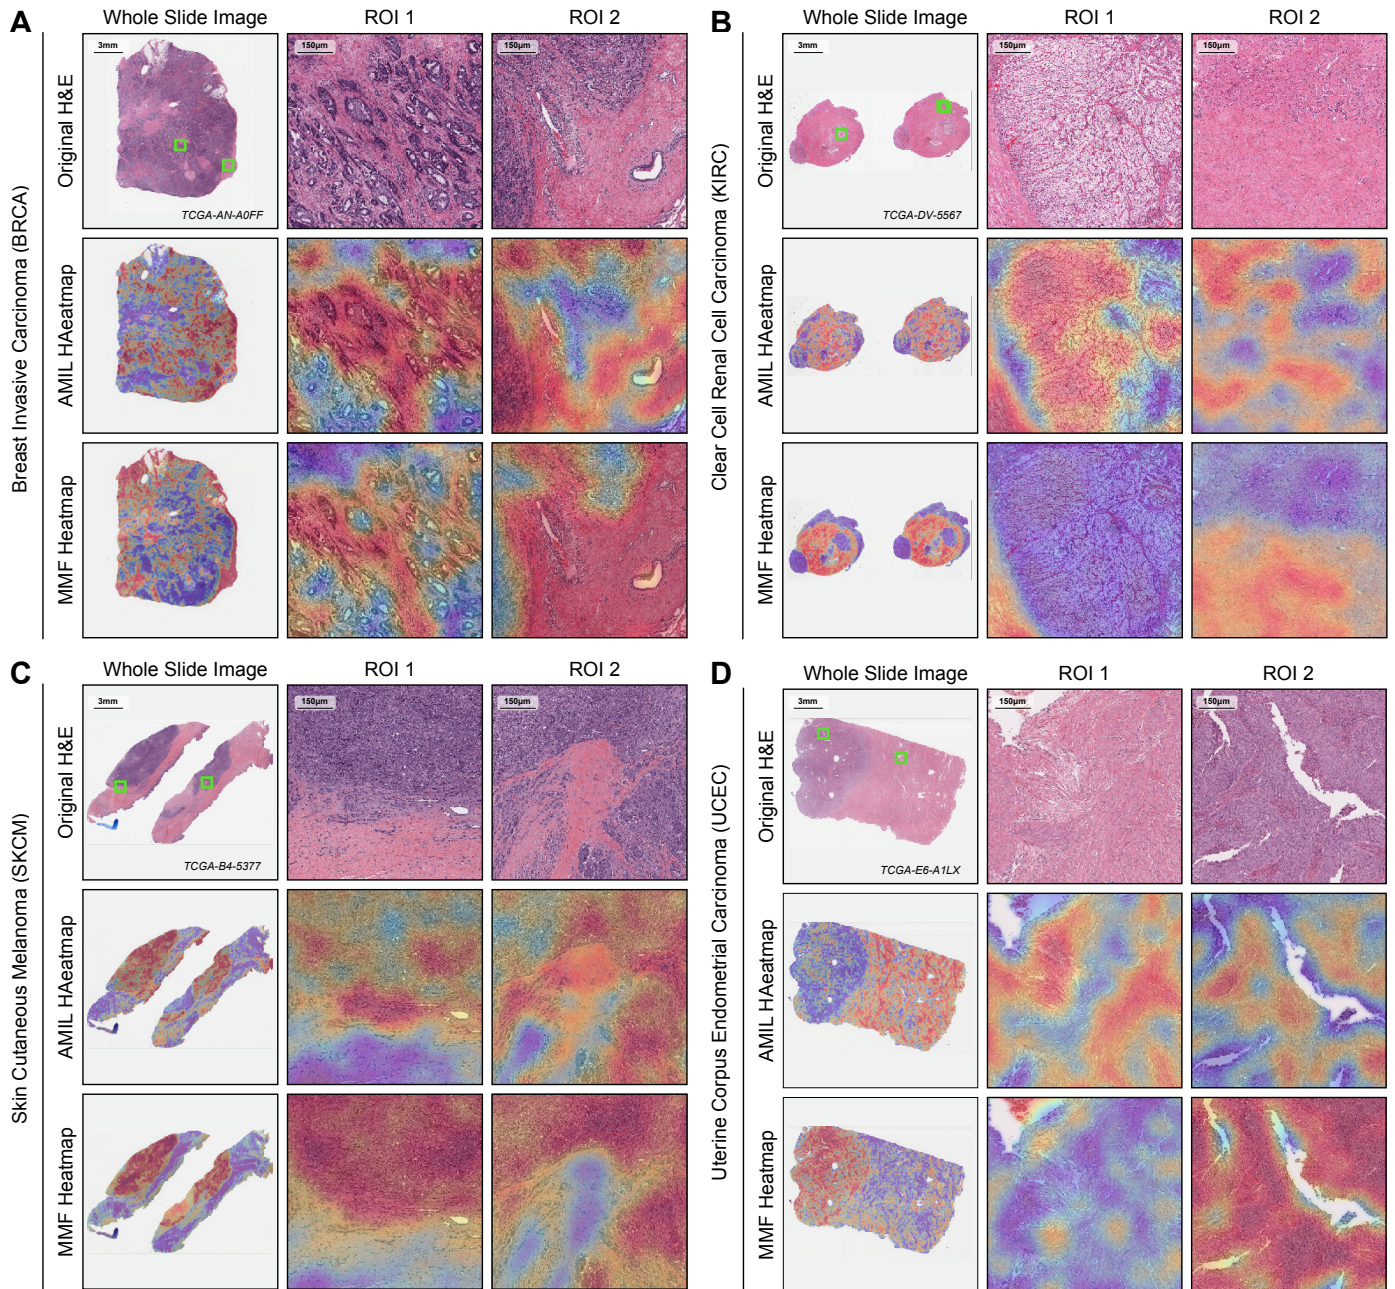

**Figure S12: Exemplars of attention shift from unimodal to multimodal interpretability in WSIs. Related to Figure 2.** Using PORPOISE, we investigated and examined how feature importance in high attention regions shifts when comparing AMIL (trained with histology-only) vs. MMF (histology conditioned with molecular profiles). In the assessment of each cancer type, "ROI 1" corresponds to a region where attention decreased from AMIL to MMF, and "ROI 2" corresponds to a region where attention increased from AMIL to MMF. **A.** In BRCA, attention shifted away from dense areas of tumor to both tumor and stromal regions in MMF. **B.** In KIRC, both stroma and tumor regions with classic "chicken-wire" vasculature are present in high attention regions in AMIL, whereas MMF attends to only stroma and completely segments out the tumor regions. **C.** In SKCM, both AMIL and MMF were able to localize tumor regions, with MMF being able to identify clear tumor-stroma boundaries. **D.** In UCEC, attention shifted towards dense tumor regions and away from stroma in MMF.

## Supplemental Tables

**Table S1. TCGA Pan-Cancer Demographic Characteristics. Related to Figure 1 and 2.**

| Cancer   | No. Cases | Age         | Gender M/F | White/Black/Other/NA | Grade 1/2/3/4/NA | Censorship |
|----------|-----------|-------------|------------|----------------------|------------------|------------|
| BLCA     | 373       | 68.0 ± 10.6 | 277/96     | 297/20/42/0/14       | 20/0/0/351/2     | 0.547      |
| BRCA     | 730       | 57.4 ± 13.3 | 10/720     | 490/138/43/1/62      | NA               | 0.860      |
| COADREAD | 339       | 64.9 ± 13.0 | 180/159    | 247/56/12/1/27       | NA               | 0.761      |
| HNSC     | 416       | 61.2 ± 11.9 | 307/109    | 353/42/8/2/13        | 53/247/100/4/12  | 0.526      |
| KIRC     | 345       | 60.1 ± 12.0 | 219/126    | 283/50/7/0/6         | 11/146/135/46/7  | 0.733      |
| KIRP     | 259       | 61.5 ± 12.1 | 189/70     | 183/58/6/1/12        | NA               | 0.846      |
| LGG      | 479       | 43.4 ± 13.4 | 268/211    | 453/21/7/1/10        | 0/229/249/0/1    | 0.766      |
| LIHC     | 333       | 59.3 ± 13.2 | 223/110    | 165/13/149/0/8       | 44/160/112/12/5  | 0.655      |
| LUAD     | 453       | 65.2 ± 10.0 | 208/245    | 344/51/7/1/52        | NA               | 0.651      |
| LUSC     | 450       | 67.2 ± 8.6  | 336/114    | 315/27/9/0/99        | NA               | 0.573      |
| PAAD     | 166       | 64.5 ± 11.0 | 91/75      | 146/6/11/0/4         | 26/91/45/2/2     | 0.458      |
| SKCM     | 230       | 59.5 ± 15.6 | 140/90     | 220/1/9/0/6          | NA               | 0.613      |
| STAD     | 348       | 65.3 ± 10.5 | 227/121    | 211/10/80/1/46       | 8/123/209/0/8    | 0.601      |
| UCEC     | 480       | 63.9 ± 11.1 | 0/480      | 326/96/19/11/29      | 94/113/265/8     | 0.844      |

**Table S2. c-Index Model Performances on Survival Prediction across 14 Cancer Types with Logrank Test Significance for Patient Stratification. Related to Figure 2.**

| Study    | SNN                 | P-Value  | MIL                        | P-Value  | MMF                        | P-Value  |
|----------|---------------------|----------|----------------------------|----------|----------------------------|----------|
| BLCA     | 0.595 (0.535-0.637) | 2.35e-03 | 0.542 (0.486-0.580)        | 2.14e-01 | <b>0.631 (0.572-0.671)</b> | 2.30e-03 |
| BRCA     | 0.586 (0.525-0.643) | 2.19e-01 | 0.560 (0.489-0.615)        | 2.70e-01 | <b>0.628 (0.571-0.680)</b> | 3.99e-03 |
| COADREAD | 0.580 (0.496-0.654) | 7.60e-02 | 0.546 (0.466-0.617)        | 2.44e-01 | <b>0.640 (0.562-0.705)</b> | 2.61e-02 |
| HNSC     | 0.516 (0.478-0.572) | 5.10e-01 | 0.564 (0.507-0.592)        | 3.15e-01 | <b>0.573 (0.525-0.617)</b> | 6.82e-02 |
| KIRC     | 0.633 (0.567-0.697) | 2.99e-02 | 0.567 (0.508-0.650)        | 5.98e-02 | <b>0.659 (0.589-0.709)</b> | 4.38e-06 |
| KIRP     | 0.779 (0.678-0.857) | 2.27e-03 | 0.539 (0.408-0.625)        | 5.86e-01 | <b>0.816 (0.705-0.880)</b> | 3.83e-04 |
| LGG      | 0.792 (0.738-0.841) | 5.68e-10 | 0.668 (0.614-0.734)        | 1.82e-04 | <b>0.808 (0.745-0.844)</b> | 7.09e-12 |
| LIHC     | 0.594 (0.534-0.656) | 1.27e-01 | 0.618 (0.563-0.684)        | 2.51e-04 | <b>0.622 (0.559-0.681)</b> | 7.36e-02 |
| LUAD     | 0.554 (0.493-0.613) | 2.48e-01 | 0.548 (0.489-0.597)        | 1.14e-01 | <b>0.600 (0.548-0.657)</b> | 1.78e-02 |
| LUSC     | 0.522 (0.476-0.572) | 2.17e-01 | <b>0.561 (0.500-0.597)</b> | 2.76e-02 | 0.538 (0.472-0.575)        | 5.99e-02 |
| PAAD     | 0.593 (0.507-0.656) | 5.59e-02 | 0.580 (0.485-0.613)        | 2.30e-01 | <b>0.653 (0.571-0.696)</b> | 1.69e-03 |
| SKCM     | 0.644 (0.568-0.691) | 1.37e-02 | 0.607 (0.509-0.661)        | 7.35e-03 | <b>0.651 (0.581-0.710)</b> | 1.74e-03 |
| STAD     | 0.513 (0.453-0.560) | 7.00e-01 | 0.556 (0.494-0.598)        | 9.13e-02 | <b>0.563 (0.496-0.607)</b> | 1.04e-01 |
| UCEC     | 0.580 (0.484-0.621) | 1.49e-01 | <b>0.638 (0.563-0.701)</b> | 2.66e-03 | 0.634 (0.527-0.667)        | 2.33e-02 |
| Overall  | 0.606               | -        | 0.578                      | -        | <b>0.644</b>               | -        |
